# Supplementary material for: Complete Genome Sequence, Molecular Characterization and Phylogenetic Relationships of a Novel Tern Atadenovirus
Source: MDPI journal article supplement (doi:10.3390/microorganisms10010031), 2021-12-24
Supplement: s1 [file s1]

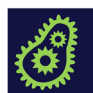

# Supplementary Materials:

**Table S1.** List of predicted donor and acceptor splice sites in the TeAdV-1 genome. Data obtained using BDGP Splice Site Prediction by Neural Network [24]. The sites involved in the formation of protein sequences are marked with a (\*) sign.

| Type  | Strand | Start | End  | Score | Sequence         |
|-------|--------|-------|------|-------|------------------|
| Donor | +      | 388   | 402  | 0.46  | caggatcgtaaggca  |
| Donor | +      | 471   | 485  | 0.89  | ccagcagggtataatg |
| Donor | +      | 913   | 927  | 0.54  | gttttacgtaaatca  |
| Donor | +      | 1021  | 1035 | 0.96  | tggtgttgaagttc   |
| Donor | +      | 1059  | 1073 | 0.99  | acaccaagtaagtta  |
| Donor | +      | 1188  | 1202 | 0.95  | ttcttttgaagtgt   |
| Donor | +      | 1698  | 1712 | 0.59  | gtaacagggtcatta  |
| Donor | +      | 1794  | 1808 | 0.98  | gttttaagtaagtat  |
| Donor | +      | 2160  | 2174 | 0.68  | acaaaaggttgaggt  |
| Donor | +      | 2367  | 2381 | 0.89  | aaaagtggtatgtgg  |
| Donor | +      | 2391  | 2405 | 0.98  | tctccggtatattat  |
| Donor | +      | 2495  | 2509 | 0.88  | taataaggtatatga  |
| Donor | +      | 2511  | 2525 | 0.99  | ttagccggtatgtat  |
| Donor | +      | 3008  | 3022 | 0.57  | tcatctggtgaataa  |
| Donor | +      | 3323  | 3337 | 0.53  | ttagatggtaaagca  |
| Donor | +      | 4018  | 4032 | 0.96  | gggcagagtaagtat  |
| Donor | +      | 4041  | 4055 | 0.51  | gtactgggtcagttt  |
| Donor | +      | 4306  | 4320 | 0.96  | tcacaatgtatgtct  |
| Donor | +      | 4410  | 4424 | 0.87  | tagccaagtaagatc  |
| Donor | +      | 4785  | 4799 | 0.7   | ttgctgcgtaagaga  |
| Donor | +      | 4833  | 4847 | 0.65  | cttgagggtacaatc  |
| Donor | +      | 4843  | 4857 | 0.95  | caatcaggtaggtta  |
| Donor | +      | 4935  | 4949 | 0.95  | tttccagtaagtaa   |
| Donor | +      | 5023  | 5037 | 0.87  | ccatacagtgagtta  |
| Donor | +      | 5366  | 5380 | 0.95  | tatcaaagtaagaaa  |
| Donor | +      | 5611  | 5625 | 0.99  | aaatttggttaagtag |
| Donor | +      | 5716  | 5730 | 1     | ttgcatggtaagttt  |
| Donor | +      | 6324  | 6338 | 0.61  | tacaaaagtaggttt  |
| Donor | +      | 6597  | 6611 | 0.91  | aaacatggtaaaagc  |
| Donor | +      | 7788  | 7802 | 0.42  | ttttgaagtaaatca  |
| Donor | +      | 7959  | 7973 | 0.99  | gttattggtaagtta  |
| Donor | +      | 8055  | 8069 | 0.93  | ctgaaaggtaaacca  |
| Donor | +      | 8226  | 8240 | 1     | gtgtaagggtgagtc  |
| Donor | +      | 8671  | 8685 | 0.77  | cgaaaagggtattgat |
| Donor | +      | 8875  | 8889 | 0.92  | cgtttaggttagttg  |
| Donor | +      | 9234  | 9248 | 0.87  | gataaaggtagaaag  |
| Donor | +      | 9380  | 9394 | 0.52  | gattactgtaagaca  |
| Donor | +      | 9491  | 9505 | 0.78  | tcaaatggtaacatt  |
| Donor | +      | 9750  | 9764 | 0.96  | aaaacaagtacgtat  |

| Type   | Strand | Start | End   | Score | Sequence         |
|--------|--------|-------|-------|-------|------------------|
| Donor  | +      | 9938  | 9952  | 0.87  | agatactgtgagtga  |
| Donor  | +      | 10521 | 10535 | 0.98  | aaatacggtaaattt  |
| Donor  | +      | 10606 | 10620 | 0.98  | ataacaagtaagtta  |
| Donor  | +      | 10858 | 10872 | 0.76  | gttaagggtataaaa  |
| Donor  | +      | 12024 | 12038 | 0.76  | ttttagggtaaaagt  |
| Donor  | +      | 12493 | 12507 | 0.93  | ccagaagggtatatca |
| Donor  | +      | 13199 | 13213 | 0.91  | agttagagtaagaac  |
| Donor  | +      | 13300 | 13314 | 0.77  | atataagggtatatta |
| Donor  | +      | 14483 | 14497 | 0.72  | atcgctggtagggaat |
| Donor  | +      | 15020 | 15034 | 0.67  | ggtaaagggtagaata |
| Donor  | +      | 15341 | 15355 | 0.87  | aatgcagggtagtttt |
| Donor  | +      | 15401 | 15415 | 0.88  | agaaaatagtgagtta |
| Donor  | +      | 15519 | 15533 | 0.62  | atgatgggtatgaag  |
| Donor  | +      | 15835 | 15849 | 0.5   | acctaagtgaattga  |
| Donor  | +      | 16028 | 16042 | 0.47  | cttcctggtacatat  |
| Donor  | +      | 16091 | 16105 | 0.49  | actttgggtaatgac  |
| Donor  | +      | 16177 | 16191 | 0.98  | tgatacagtaagtga  |
| Donor  | +      | 16644 | 16658 | 0.4   | atcaagggtacagtt  |
| Donor  | +      | 16970 | 16984 | 0.54  | aatatgggtacatta  |
| Donor  | +      | 17652 | 17666 | 0.92  | aaaaccagtatgtcc  |
| Donor  | +      | 17961 | 17975 | 0.82  | acttaaagtgaggaa  |
| Donor  | +      | 19560 | 19574 | 0.53  | tttataggtaaacca  |
| Donor  | +      | 20319 | 20333 | 0.96  | aatcatggttaattac |
| Donor  | +      | 20537 | 20551 | 0.47  | agtatttgaagcga   |
| Donor  | +      | 20691 | 20705 | 0.76  | aaaagaggtagtggt  |
| Donor  | +      | 20721 | 20735 | 0.98  | gacaccggtgaggaa  |
| Donor* | +      | 20965 | 20979 | 0.92  | atacctagtaagtaa  |
| Donor  | +      | 21160 | 21174 | 0.51  | tctacacgtacaagt  |
| Donor  | +      | 21505 | 21519 | 0.58  | tgccaatgtaaatag  |
| Donor  | +      | 22914 | 22928 | 0.89  | caatcaggtagagtt  |
| Donor  | +      | 23230 | 23244 | 0.59  | gcactaagtaattct  |
| Donor  | +      | 23353 | 23367 | 0.87  | aactatggtaactca  |
| Donor  | +      | 24022 | 24036 | 0.93  | acaccgggtaaattc  |
| Donor  | +      | 24385 | 24399 | 0.98  | atttaaagtaagaca  |
| Donor  | +      | 24616 | 24630 | 0.91  | atacagggtaathtt  |
| Donor  | +      | 25158 | 25172 | 0.49  | ttcagaggtagtcct  |
| Donor  | +      | 25297 | 25311 | 0.98  | tcgagaggtaaatgt  |
| Donor  | +      | 25514 | 25528 | 0.85  | agcaatggtaaaaat  |
| Donor  | +      | 25886 | 25900 | 0.93  | gtccatgggtatgacc |
| Donor  | +      | 25990 | 26004 | 0.68  | ccaaccagtaataaa  |
| Donor  | +      | 26743 | 26757 | 0.56  | atttcaagtaaatga  |
| Donor  | +      | 27268 | 27282 | 0.6   | gttgagggtgcttct  |
| Donor  | +      | 27351 | 27365 | 0.49  | ttgctaggtagatac  |
| Donor  | +      | 28500 | 28514 | 0.84  | gcgctacgtatgtcg  |
| Donor  | +      | 28659 | 28673 | 0.95  | tgctgctgaagtat   |

| Type  | Strand | Start | End   | Score | Sequence        |
|-------|--------|-------|-------|-------|-----------------|
| Donor | +      | 29557 | 29571 | 0.96  | atgtcaagtaagggt |
| Donor | +      | 30164 | 30178 | 0.63  | ccaacaggttacatg |
| Donor | +      | 30336 | 30350 | 0.91  | aattactgtgagtta |
| Donor | +      | 30532 | 30546 | 0.82  | aaatgcggtatggat |
| Donor | +      | 31275 | 31289 | 0.93  | aattaaagtaaata  |
| Donor | -      | 31161 | 31147 | 0.74  | ACACTACGTAAATTT |
| Donor | -      | 30803 | 30789 | 0.84  | AGAAATCGTAAGGTG |
| Donor | -      | 30773 | 30759 | 1     | TCTGTCCGTAAGTAC |
| Donor | -      | 30731 | 30717 | 0.79  | CTCTTAGGTTTGTC  |
| Donor | -      | 30195 | 30181 | 0.8   | TTTAGATGTGAGTAC |
| Donor | -      | 30170 | 30156 | 0.69  | CTGTTGGGTAGGTTT |
| Donor | -      | 29232 | 29218 | 0.99  | AAGTAATGTAAGTGA |
| Donor | -      | 28851 | 28837 | 0.99  | TCATCATGTAAGTAT |
| Donor | -      | 28494 | 28480 | 0.44  | ATTCGCAGTAGGTGC |
| Donor | -      | 27577 | 27563 | 0.73  | CAGTGAAGTGAGCAG |
| Donor | -      | 27420 | 27406 | 0.87  | ATTGCAGGTATAACG |
| Donor | -      | 27193 | 27179 | 0.75  | ATACAAGGTCCGTGT |
| Donor | -      | 26975 | 26961 | 0.96  | AAGTATTGTAAGTGA |
| Donor | -      | 26458 | 26444 | 0.95  | GAATATTGTAAGTAT |
| Donor | -      | 26140 | 26126 | 0.76  | TGACCAAGTGTGTAC |
| Donor | -      | 26046 | 26032 | 0.74  | ATACCAGGTGAAACG |
| Donor | -      | 25382 | 25368 | 0.78  | ATGCACTGTAAGAGA |
| Donor | -      | 25346 | 25332 | 0.77  | GCATTACGTATGTTT |
| Donor | -      | 25114 | 25100 | 0.58  | GCTGAAGGTGAATTC |
| Donor | -      | 24661 | 24647 | 0.99  | ATCAGAGGTATGTTT |
| Donor | -      | 24461 | 24447 | 0.89  | TAAGTATGTAAGTGG |
| Donor | -      | 23418 | 23404 | 0.69  | TGCCAAGGTATTATC |
| Donor | -      | 23145 | 23131 | 0.96  | ACTTAAGGTTAGGGG |
| Donor | -      | 22980 | 22966 | 0.97  | ATTTAACGTGAGTTT |
| Donor | -      | 22712 | 22698 | 0.44  | TTAGAAGGTATTTTA |
| Donor | -      | 22586 | 22572 | 0.73  | TCAAGTGGTAACTGT |
| Donor | -      | 22378 | 22364 | 0.44  | CGAAAGGGTACACAG |
| Donor | -      | 22152 | 22138 | 0.97  | TTTTAATGTAAGTAT |
| Donor | -      | 22108 | 22094 | 0.97  | ATTAGAAGTACGTCT |
| Donor | -      | 21759 | 21745 | 0.85  | GGAAATGGTAGGTTA |
| Donor | -      | 21745 | 21731 | 0.73  | ATCTCTAGTGAGTTT |
| Donor | -      | 21381 | 21367 | 0.75  | GTAGCAGGTTGGTAT |
| Donor | -      | 21218 | 21204 | 0.87  | CGTACAGGTATCGTT |
| Donor | -      | 21177 | 21163 | 0.44  | CTAACTTGTACGTGT |
| Donor | -      | 20538 | 20524 | 0.95  | CTGTCAAGTAAGAAT |
| Donor | -      | 20513 | 20499 | 0.98  | CTGAGGGGTGAGTTT |
| Donor | -      | 20251 | 20237 | 0.92  | TGTAAAGGTACCACA |
| Donor | -      | 20236 | 20222 | 0.53  | TCAGATGGTAACATG |
| Donor | -      | 20146 | 20132 | 0.98  | AAATCAGGTAAATTA |
| Donor | -      | 19895 | 19881 | 0.55  | CAATTGCGTATGTAG |

| Type   | Strand | Start | End   | Score | Sequence         |
|--------|--------|-------|-------|-------|------------------|
| Donor  | -      | 19859 | 19845 | 0.52  | TCTATGTGTAAGGCC  |
| Donor  | -      | 19817 | 19803 | 0.42  | ACAATTTGTAAGAAT  |
| Donor  | -      | 19534 | 19520 | 0.99  | ATTGGTGGTAAGCCA  |
| Donor  | -      | 19351 | 19337 | 0.96  | CCGACAGGTAAATTT  |
| Donor  | -      | 18489 | 18475 | 0.74  | AAATGGGGTAAACAA  |
| Donor  | -      | 18078 | 18064 | 0.96  | AAATCATGTGAGTTT  |
| Donor  | -      | 17920 | 17906 | 0.87  | TGCAGAAGTATGTAT  |
| Donor  | -      | 17755 | 17741 | 0.93  | TGACAATGTGAGTTT  |
| Donor  | -      | 17623 | 17609 | 0.72  | TCATAATGTAATTAT  |
| Donor  | -      | 17253 | 17239 | 0.74  | AAGAAAAGTATGTTG  |
| Donor  | -      | 17166 | 17152 | 0.76  | GCAAAAGGTAGTCTC  |
| Donor  | -      | 16877 | 16863 | 0.81  | TAAGAGGGTATGGCC  |
| Donor  | -      | 16528 | 16514 | 0.45  | GTTAGGTGTAAGCAA  |
| Donor  | -      | 16451 | 16437 | 0.63  | GAGTTAGGTAAAATG  |
| Donor  | -      | 15724 | 15710 | 0.72  | AAGAAAAGTACGCTG  |
| Donor  | -      | 15665 | 15651 | 0.96  | AACCAATGTAAGCTG  |
| Donor  | -      | 15451 | 15437 | 0.8   | CCTATCTGTGAGTTC  |
| Donor  | -      | 15239 | 15225 | 0.92  | TAACAAGGTGTGAAT  |
| Donor  | -      | 14889 | 14875 | 0.98  | ATTTGAGGTAATTGA  |
| Donor  | -      | 14827 | 14813 | 0.75  | TGCAGAAGTAGGTGC  |
| Donor  | -      | 14810 | 14796 | 0.66  | ATGGATTGTAAGCAG  |
| Donor  | -      | 14655 | 14641 | 0.44  | TGAATAGGTACAATC  |
| Donor  | -      | 14646 | 14632 | 0.49  | ACAATCCGTAGGTGC  |
| Donor  | -      | 14516 | 14502 | 0.77  | CAGAAAGGTATTCCC  |
| Donor  | -      | 14278 | 14264 | 0.92  | GCAACAGGTATATCA  |
| Donor  | -      | 14165 | 14151 | 0.97  | CTCTTGTGTAAGTGG  |
| Donor  | -      | 13695 | 13681 | 0.82  | ATCAAAGGTATCAAT  |
| Donor  | -      | 13224 | 13210 | 0.97  | CTCTATAGTAAGTTC  |
| Donor  | -      | 12911 | 12897 | 0.94  | ACAGAAGGTACATTT  |
| Donor  | -      | 12891 | 12877 | 0.97  | GATCCAAGTAAGAGT  |
| Donor  | -      | 12624 | 12610 | 0.95  | TGGAAGTGTAAAGTAA |
| Donor  | -      | 12499 | 12485 | 0.91  | CTTCTGGGTCAGTCA  |
| Donor  | -      | 12443 | 12429 | 0.83  | AGTGCAGGTATATTA  |
| Donor  | -      | 12064 | 12050 | 0.72  | TAGAAGGGTCAGTTT  |
| Donor  | -      | 11789 | 11775 | 0.46  | TGCAGAGGTGGGAAA  |
| Donor* | -      | 11686 | 11672 | 0.92  | ACGTCAGGTAATATT  |
| Donor  | -      | 11314 | 11300 | 0.94  | TAGCAGCGTAAGGAT  |
| Donor  | -      | 11050 | 11036 | 0.63  | GTTGCATGTATGTAA  |
| Donor  | -      | 10887 | 10873 | 0.81  | TCTAGGTGTGAGTGA  |
| Donor  | -      | 10604 | 10590 | 0.44  | TTAGAAGGTAATATA  |
| Donor  | -      | 10403 | 10389 | 0.93  | CCCAAAGGTACAGTT  |
| Donor  | -      | 9911  | 9897  | 0.5   | TGCAGTCGTAAGGCT  |
| Donor  | -      | 8576  | 8562  | 0.66  | ATATACAGTAAATAC  |
| Donor  | -      | 7668  | 7654  | 0.82  | GAAGATGGTTAGTTA  |
| Donor  | -      | 7083  | 7069  | 0.46  | TTTAAACGTAGGCCT  |

| Type     | Strand | Start | End  | Score | Sequence                                  |
|----------|--------|-------|------|-------|-------------------------------------------|
| Donor    | -      | 6936  | 6922 | 0.67  | AGAAATTGTAAGAGT                           |
| Donor    | -      | 6081  | 6067 | 0.94  | AATGAAGGTACAAGG                           |
| Donor    | -      | 6060  | 6046 | 0.44  | ATTTATGGTTAGAGA                           |
| Donor    | -      | 5014  | 5000 | 0.96  | CAACAAGGTTAGACA                           |
| Donor*   | -      | 4619  | 4605 | 0.8   | TTTACAAGTGAGTGG                           |
| Donor    | -      | 4583  | 4569 | 0.44  | GATAGGGGTAAAAAT                           |
| Donor    | -      | 4487  | 4473 | 0.84  | ACTGTAGGTAAACAT                           |
| Donor    | -      | 4460  | 4446 | 0.61  | AATGGTGGTAAATTA                           |
| Donor    | -      | 4289  | 4275 | 0.98  | CAACCAGGTAAATTA                           |
| Donor    | -      | 3922  | 3908 | 0.5   | TGACGTGGTAAAAAT                           |
| Donor    | -      | 3696  | 3682 | 0.96  | GGCAGCGGTAAATCG                           |
| Donor    | -      | 3558  | 3544 | 0.99  | ATAGAAGGTAACACT                           |
| Donor    | -      | 2785  | 2771 | 0.66  | ACATCAGGTATCATA                           |
| Donor    | -      | 2561  | 2547 | 0.41  | TGTCCATGTAGGAGG                           |
| Donor    | -      | 2553  | 2539 | 0.99  | TAGGAGGGTACGTAG                           |
| Donor    | -      | 2160  | 2146 | 0.97  | TTGTCCAGTAAGTAT                           |
| Donor    | -      | 1724  | 1710 | 0.62  | AGGCCATGTAGGTAA                           |
| Donor    | -      | 1483  | 1469 | 0.69  | GGATCTGGTAAATTT                           |
| Donor    | -      | 1297  | 1283 | 0.72  | TCAAGAAGTAAATCA                           |
| Donor    | -      | 1010  | 996  | 0.61  | GAAATATGTAAGAAA                           |
| Donor    | -      | 855   | 841  | 0.41  | CAACATGGTCAGGAG                           |
| Donor    | -      | 502   | 488  | 0.51  | ATTAGAGGTATTTTA                           |
| Donor    | -      | 238   | 224  | 0.74  | TAAAAAGGTAGAATA                           |
| Acceptor | +      | 410   | 450  | 0.4   | tacttgcttctctttccaaggagatatcctaaccgtcaa   |
| Acceptor | +      | 457   | 497  | 0.51  | ctagaattatccatccagcaggataatgttttaaacct    |
| Acceptor | +      | 805   | 845  | 0.62  | agttgtattgtctactgttagttgatggaaactgcactcct |
| Acceptor | +      | 1129  | 1169 | 0.98  | ttatttttatctttttatagtgagaagaactatactgttt  |
| Acceptor | +      | 1684  | 1724 | 0.81  | ctgcttttccatttgtaacaggtgcattacctacatggcct |
| Acceptor | +      | 1756  | 1796 | 0.51  | ctgtttatacaatttctccagatgaaataataaactatgtt |
| Acceptor | +      | 1997  | 2037 | 0.72  | tcttgaagatgttctgatagatctgagcatatgcaggttg  |
| Acceptor | +      | 2284  | 2324 | 0.91  | agatatgtttctatgtaaatgggtgaattggaatagatct  |
| Acceptor | +      | 2893  | 2933 | 0.74  | taatttctttatattgcagttgtgcatatgttctctttc   |
| Acceptor | +      | 3169  | 3209 | 0.81  | acttatttgtgttgattccagttggggactaataacgtgac |
| Acceptor | +      | 3387  | 3427 | 0.89  | catctattataattgctataggtccttttcagctgcacga  |
| Acceptor | +      | 3399  | 3439 | 0.68  | ttgctataggtccttttcagctgcagagcaaatatgttg   |
| Acceptor | +      | 3570  | 3610 | 0.73  | cccatgtcatttgttctcagtgctgattgtattagattca  |
| Acceptor | +      | 3765  | 3805 | 0.55  | tcatttttgtgtgtactagctataatttgtgtatgtt     |
| Acceptor | +      | 3789  | 3829 | 0.75  | taattttgtgtatgttacagcgtgattgtataaattcatta |
| Acceptor | +      | 3841  | 3881 | 0.82  | atgacatgacgcttttctagaactgtatctagattggaa   |
| Acceptor | +      | 4094  | 4134 | 0.79  | tcagttgtttccattacagtgaatgggttgatttctga    |
| Acceptor | +      | 4466  | 4506 | 0.65  | ttaatcgatgtttacactacagttaacattcttcatgacca |
| Acceptor | +      | 4617  | 4657 | 0.47  | aaatgctctcgtccagccagaacgaatgatgcgatctgtg  |
| Acceptor | +      | 4856  | 4896 | 0.44  | taataaactgtttgttttagtgaagtctgttctaggtaga  |
| Acceptor | +      | 4871  | 4911 | 0.77  | ttttagtgaagtctgttctaggtagatgaacaaataaca   |
| Acceptor | +      | 4922  | 4962 | 0.95  | ctgtaatttctgctttccagtaagtaacttaattaagtct  |

| Type     | Strand | Start | End   | Score | Sequence                                  |
|----------|--------|-------|-------|-------|-------------------------------------------|
| Acceptor | +      | 5066  | 5106  | 0.99  | ttaaattttttcttttcagcttttcttttgctttaatg    |
| Acceptor | +      | 5725  | 5765  | 0.8   | aagtttatttcattttcgcagaatagttttagccttcaac  |
| Acceptor | +      | 5801  | 5841  | 0.8   | catcgatgcagtattttatagattctgatattatgctgat  |
| Acceptor | +      | 5831  | 5871  | 0.52  | ttatgctgatgttttgccagcttctggtttgtttctaga   |
| Acceptor | +      | 5850  | 5890  | 0.96  | agcttctgggttttcttagatattcttttcagaggccc    |
| Acceptor | +      | 5864  | 5904  | 0.93  | ttctagatattcttttcagaggccagattttgcgtgca    |
| Acceptor | +      | 6124  | 6164  | 0.66  | ttgggtttaggtttttcatagcttgattcggaagattgag  |
| Acceptor | +      | 6351  | 6391  | 0.91  | caattgtgtttttattttagtgcataatacttcatatg    |
| Acceptor | +      | 6415  | 6455  | 0.8   | tgtcttgcgaacttttccagactgcgtagcaaatcttt    |
| Acceptor | +      | 6772  | 6812  | 0.82  | tagtattcgcgttttctgtagtgcagttgtgtattttga   |
| Acceptor | +      | 6978  | 7018  | 0.92  | tgcattaatttttgcgatgttctgtatttgatctatag    |
| Acceptor | +      | 6998  | 7038  | 0.62  | gttctgttattgatctatagatgttctgtaatcttctcg   |
| Acceptor | +      | 7023  | 7063  | 0.82  | tcctgtaattcttctggtcagatgggtcaatttaagtta   |
| Acceptor | +      | 7142  | 7182  | 0.84  | ttgctcgggttttgttacagtgtctgactccgtctccatg  |
| Acceptor | +      | 7183  | 7223  | 0.64  | tttgattgcttactcttagtggcgtcgaacgatcaagt    |
| Acceptor | +      | 7267  | 7307  | 0.43  | ttctaaatgatatttccacagattctacatcaatacatta  |
| Acceptor | +      | 7414  | 7454  | 0.59  | tatctgaatttctacttatagtaacaaagtcagcctaatt  |
| Acceptor | +      | 7516  | 7556  | 0.97  | cctctccatttctgttctagctcggagattactgtgca    |
| Acceptor | +      | 7766  | 7806  | 0.79  | ctgggataattcgtcttctagatttgaagtaaatcaacta  |
| Acceptor | +      | 7826  | 7866  | 0.43  | gttatattcttgcctactcagaccgacttcacgtcggtctg |
| Acceptor | +      | 7867  | 7907  | 0.92  | acggtcctgggtactctcaggttctgttgggtgacggc    |
| Acceptor | +      | 7924  | 7964  | 0.7   | catcgctacatctgccgcaggcgctgcgtcggtgttatt   |
| Acceptor | +      | 8142  | 8182  | 0.94  | atttctttatgttctttaaaggtgtcttccatagctgt    |
| Acceptor | +      | 8157  | 8197  | 0.82  | ttaaaggttcttccatagctgtgattgtctgacatagt    |
| Acceptor | +      | 8861  | 8901  | 0.92  | cattatacgctgtcgtttaggttagttgtatttgcatat   |
| Acceptor | +      | 8964  | 9004  | 0.48  | aaaaaatgtgtcttgaacagatgcatccaattatgaagaa  |
| Acceptor | +      | 9146  | 9186  | 0.67  | agaagcagttgataattttatagatcctgaacaaaaatgt  |
| Acceptor | +      | 10215 | 10255 | 0.64  | ttttctgatcttttaattagagttcacaaataatagta    |
| Acceptor | +      | 10701 | 10741 | 0.66  | tgtttatttaataatttatagagatactgtctgttcca    |
| Acceptor | +      | 11135 | 11175 | 0.75  | attactcagattttacatagatatgcaaaattcaaatgat  |
| Acceptor | +      | 11624 | 11664 | 0.75  | tacatatgttttcacatctagctccaaaacgaggaaaaata |
| Acceptor | +      | 11709 | 11749 | 0.51  | aacgtacaatgctcctcctagaatttttgcgccaacagaag |
| Acceptor | +      | 11795 | 11835 | 0.66  | caacgaataatttttatagacaacaaacaagtgatata    |
| Acceptor | +      | 12009 | 12049 | 0.62  | taataatagtaactctttagggtaaagtaagtattgata   |
| Acceptor | +      | 12713 | 12753 | 0.91  | ttgctactctccagttgtaggaatgcagttgttccacta   |
| Acceptor | +      | 12816 | 12856 | 0.58  | taatacgttggtgttcaatagatttccaactaatgaatac  |
| Acceptor | +      | 12896 | 12936 | 0.79  | aaaatgtaccttctgttacagatcacggccagcagccgttg |
| Acceptor | +      | 13547 | 13587 | 0.75  | attaaatttgtaattttccagatgagaacaagaacctacag |
| Acceptor | +      | 13764 | 13804 | 0.98  | aaatacttttcattaacagattttgagcgtgaatatggc   |
| Acceptor | +      | 14435 | 14475 | 0.83  | aagatagttattttatccagatggagccacagagagaatt  |
| Acceptor | +      | 14583 | 14623 | 0.43  | cttatgtagctcttcatcaggagtaactacggatcggtcg  |
| Acceptor | +      | 15294 | 15334 | 0.62  | gtttcagggacaattttataggtattatgtattataactct |
| Acceptor | +      | 15417 | 15457 | 0.42  | gttatcaatttttaattgcagaactcacagataggataaaa |
| Acceptor | +      | 16861 | 16901 | 0.53  | ttggccataccctcttattagtgtgttgcggttaaggatc  |
| Acceptor | +      | 17084 | 17124 | 0.95  | ctatttgggtttttgatcaggttgttgtgaatcagcctac  |

| Type      | Strand | Start | End   | Score | Sequence                                   |
|-----------|--------|-------|-------|-------|--------------------------------------------|
| Acceptor  | +      | 17267 | 17307 | 0.67  | gtagatttcctgggttttagatagtaataagattaaaaact  |
| Acceptor  | +      | 17853 | 17893 | 0.84  | caacaacctgcgcttttttagcgatgggtatatcgccaaat  |
| Acceptor  | +      | 17934 | 17974 | 0.99  | catTTTTacttgcttgcagggctccactaaagtgagga     |
| Acceptor  | +      | 18007 | 18047 | 0.57  | ataccacaggtttcttctagaaatcattgctgaataacat   |
| Acceptor  | +      | 18220 | 18260 | 0.41  | tttggcaatctgcctccctagtagtgccctattgcatagt   |
| Acceptor  | +      | 18417 | 18457 | 0.62  | gctgctgcatgttatcttcaggacatatcattgaattttcc  |
| Acceptor  | +      | 18503 | 18543 | 0.64  | atacctcttccatcttttaaggcactcattccagcctcact  |
| Acceptor  | +      | 18745 | 18785 | 0.96  | cacatgttttgatttttttaggacctgactaaagatctttt  |
| Acceptor  | +      | 18906 | 18946 | 0.63  | tcttttctacttcttgaagtgcaggggttcttggaggtt    |
| Acceptor  | +      | 18967 | 19007 | 0.96  | tgacacggtttccctcacaggagcctgaaaaatacagatg   |
| Acceptor  | +      | 19546 | 19586 | 0.68  | tgtaataagaaattttataggtaaaccacaagaaccaaatt  |
| Acceptor  | +      | 19693 | 19733 | 0.53  | ccactttgctgcatgtatagacagatttatgaatagaag    |
| Acceptor  | +      | 19927 | 19967 | 0.88  | acacaatatattgttcttagtattatgtggcagacaatt    |
| Acceptor  | +      | 20381 | 20421 | 0.62  | taatttatgtgctctcacagaatgccatgttataatacag   |
| Acceptor* | +      | 21039 | 21079 | 0.65  | cgtactacttttaaatgtaggaaatttggagttcaatca    |
| Acceptor  | +      | 22231 | 22271 | 0.98  | ttttatccattttgttttagttaaattacattaaaagat    |
| Acceptor  | +      | 22303 | 22343 | 0.94  | tcattatattttaattacagatgaaacgagcaagaagaga   |
| Acceptor  | +      | 23033 | 23073 | 0.91  | ttaaaccttaaccttttagataacaagttagctttagac    |
| Acceptor  | +      | 24448 | 24488 | 0.9   | cacttacatacttatctatagatacttgtttaatttcaca   |
| Acceptor  | +      | 24469 | 24509 | 0.86  | atactttgtttaatttcacagtgtcatatttatcagcacat  |
| Acceptor  | +      | 25174 | 25214 | 0.76  | gtaattttcaactatcatagatttgaatgaaccataat     |
| Acceptor  | +      | 25357 | 25397 | 0.65  | tggaacattttctctacagtgcatactactgttattaca    |
| Acceptor  | +      | 25709 | 25749 | 0.78  | tatagtatttaattctctagaaccttgaataatacaga     |
| Acceptor  | +      | 25823 | 25863 | 0.54  | caaatcctgtatatattgcaggaggagaaggataatggctg  |
| Acceptor  | +      | 26055 | 26095 | 0.52  | aactgcaatgttcattttagatgaatccaaagcctgctct   |
| Acceptor  | +      | 26809 | 26849 | 0.58  | aaatctccatatctcatagttcagaccacttcataatc     |
| Acceptor  | +      | 27183 | 27223 | 0.54  | ggaccttgtagtttttagtatttttctccattctctt      |
| Acceptor  | +      | 28308 | 28348 | 0.7   | atTTTTgtgcaactcaacagaactatagttgcatacagct   |
| Acceptor  | +      | 28725 | 28765 | 0.99  | atTTTTtattatTTcttaggttgcgcactacgtcaaga     |
| Acceptor  | +      | 30014 | 30054 | 0.85  | cggaatatattctttagatattcatttttcaataaat      |
| Acceptor  | +      | 30206 | 30246 | 0.66  | ctataactttgcttctcagattttccgcatagcaataa     |
| Acceptor  | -      | 31216 | 31176 | 0.77  | ACTATTTTTATTAGTTTTTAGTACTTAATGCAGTAGTTTA   |
| Acceptor  | -      | 31008 | 30968 | 0.91  | TATATTGTGTGTTCTCCATAGCGAAGGGCGGAAGCACTTAG  |
| Acceptor  | -      | 30745 | 30705 | 0.73  | ATATGCGCACAAATCTCTTAGGTTTGTCCATGTACTCTGTA  |
| Acceptor  | -      | 30724 | 30684 | 0.97  | GTTTGTCCATGTACTCTGTAGGTGTACTGTAGAATCCGACT  |
| Acceptor  | -      | 30605 | 30565 | 0.92  | AATGTGTTTATTTTGTGTAGGCGAGGAATTCACCGAAAAT   |
| Acceptor  | -      | 30532 | 30492 | 0.61  | TTGTGATTGTTTTCGCAATAGGAGTATTTCCAGCGAAACAT  |
| Acceptor  | -      | 30142 | 30102 | 0.46  | TAAGCACTTTGTGTGTAATAGGTGATGTTAATTCACATGCA  |
| Acceptor  | -      | 29683 | 29643 | 0.88  | ATAATTCACCTTGATTTTTCAGATTAATAAATTTACATAAG  |
| Acceptor  | -      | 29177 | 29137 | 0.55  | TACGAACATTTTTCTAGACAGGATTTTGCAAGTTTGTTTA   |
| Acceptor  | -      | 29073 | 29033 | 0.54  | AAATAGACAATTTTCTCATAGACGACCGTGTATAGTGTGTA  |
| Acceptor  | -      | 28786 | 28746 | 0.97  | CTTGATGATTTTCTTTTCAGTCTTGACGTAGTGCAGCAAC   |
| Acceptor  | -      | 28504 | 28464 | 0.44  | AGCGCTCTATATTCGCAGTAGGTGCACATCCACAGTTAATA  |
| Acceptor  | -      | 27963 | 27923 | 0.67  | TGATATGCTTATTTTGGATAGGGAACGAATTGTCTGCGTT   |
| Acceptor  | -      | 27677 | 27637 | 0.87  | TAATTCITTTCTCTTGTGCAGTAACCTCGCAATCAAGTTGGG |

| Type     | Strand | Start | End   | Score | Sequence                                   |
|----------|--------|-------|-------|-------|--------------------------------------------|
| Acceptor | -      | 27434 | 27394 | 1     | TTATTTTTTTTTTATTCAGGTATAACGTCATAGACCTTC    |
| Acceptor | -      | 27087 | 27047 | 0.44  | TTGCTAAGTGTGCTTGTATAGATCATTGTTTTGTGGAAT    |
| Acceptor | -      | 26908 | 26868 | 0.48  | AAATGTGTGTTTGACTTTTAGTGCTGTGGTTACTGTCAATG  |
| Acceptor | -      | 26743 | 26703 | 0.83  | TACTATTTATTCTGTCTGTAGCTATGTACATATCATGTGTT  |
| Acceptor | -      | 26495 | 26455 | 0.58  | ACTCCGTTTTTGTAATTATAGAAGGTTTGCTTCTATTGAAT  |
| Acceptor | -      | 26406 | 26366 | 1     | ATTTTTGTTTTCTCTTACAGATGGCTAATGACGTTTCGTTA  |
| Acceptor | -      | 26266 | 26226 | 0.46  | TTACGCGGTTGGCCCTTTCAGAATTGTATTCCAATTATCTA  |
| Acceptor | -      | 26162 | 26122 | 0.89  | TCATACGGTGGCTATTTATAGATGACCAAGTGTGTACATGT  |
| Acceptor | -      | 25984 | 25944 | 0.91  | TCCTCTCTATCTCTCATATAGGGTTGGGTGGCAATAGAATG  |
| Acceptor | -      | 25666 | 25626 | 0.9   | CAGCAGGAGCTTTTTTGATAGATTCTCTTAAAAGATCAAAA  |
| Acceptor | -      | 24553 | 24513 | 0.98  | TGTTTTATGCTTTTTTGAGTGTGATTGTAACAGAAATG     |
| Acceptor | -      | 23758 | 23718 | 0.52  | TTTTATATCCCATTGTATAGAATAAAAAATAGATGATGTA   |
| Acceptor | -      | 23514 | 23474 | 0.43  | AGTATCTGGATTGTATCGCAGAGCTAATCCATCATTTGAAG  |
| Acceptor | -      | 23294 | 23254 | 0.88  | AAATTATTTCTTTACATAGAAGTTATTTGAAGTATTTAG    |
| Acceptor | -      | 23175 | 23135 | 0.48  | ATTCCTATGTTAATCCTAGTTTATCTTTACTTAAGGTTA    |
| Acceptor | -      | 23159 | 23119 | 0.91  | CCTAGTTTATCTTTACTTAAGGTTAGGGGTGACATTGGCGC  |
| Acceptor | -      | 22602 | 22562 | 0.69  | CATATTGTTATCTTTTTCAAGTGGTAACTGTACTAAACCAT  |
| Acceptor | -      | 22567 | 22527 | 0.8   | AACCATACATTCATTTGCAGATAGTTGACCTGCGCTATCT   |
| Acceptor | -      | 21818 | 21778 | 0.53  | TGGTTCCTGTTCCTTGTAAGATAACCCATTCATTTCCACTT  |
| Acceptor | -      | 21786 | 21746 | 0.75  | TTCCACTTTTGACTTGCCAGTTATAAGGAAATGGTAGGTT   |
| Acceptor | -      | 21662 | 21622 | 0.8   | GTTGTTCTCCATTACTTGTAGCTATAAAATCGTGTGATTC   |
| Acceptor | -      | 21630 | 21590 | 0.8   | TGTTGATTCTGTGCGCTGTAGGTTGTTTTCTCGCAGGAAT   |
| Acceptor | -      | 21614 | 21574 | 0.94  | TGTAGGTTGTTTTCTCGCAGGAATGTATGGCATGCCATGC   |
| Acceptor | -      | 21395 | 21355 | 0.78  | CAGCGACCTTCCCGTAGCAGGTTGGTATGACCAAAGATAA   |
| Acceptor | -      | 21268 | 21228 | 0.91  | CAGCTTCTTTGCGTCTCCAGACACTGCAGTGCCTTCTTTT   |
| Acceptor | -      | 21232 | 21192 | 0.94  | CTTTTCGTCCCGCTCGTACAGGTATCGTTTGTAACTCTG    |
| Acceptor | -      | 20989 | 20949 | 0.89  | TAATCTTTTATTACTTACTAGGTATTACAGCTTTTGCTTC   |
| Acceptor | -      | 20959 | 20919 | 0.85  | CTTTTGCTCTCTTTTTTGAGGGGGAGATATGTCATCATCG   |
| Acceptor | -      | 20827 | 20787 | 0.98  | CAGTGCCTCTTCCAGTAGCTGGGCTCTGAGAGTCCGCC     |
| Acceptor | -      | 20708 | 20668 | 0.87  | TACACCACTACCTCTTTTAGTAATTCCATTTCCCGCCTTA   |
| Acceptor | -      | 19436 | 19396 | 0.98  | AAATTTTTGATTGTTTTTAGTTCTGAAATTACAGGAGCAT   |
| Acceptor | -      | 19182 | 19142 | 0.97  | AATCATTTTTCTGTGCATCAGGTGTAAAAATACTTCTTTCT  |
| Acceptor | -      | 19160 | 19120 | 0.62  | TGTAAAAATACTTCTTTCTAGTAGCTTAGATATATATAGCA  |
| Acceptor | -      | 19106 | 19066 | 0.58  | TGCATCTTTTGATTTTAGTAGAGAACGTAATATTTTAGTTT  |
| Acceptor | -      | 19064 | 19024 | 0.48  | TCTTCAATATGTTTCATCAGGATAGGTTTTTGCAATTCCGG  |
| Acceptor | -      | 19012 | 18972 | 0.91  | AAATCCATCTGTATTTTTCAGGCTCCTGTGAGGGAAAACCG  |
| Acceptor | -      | 17468 | 17428 | 0.7   | CGTTTAATTATATGTTTATAGCTAAAATTGTAATATTTTC   |
| Acceptor | -      | 17347 | 17307 | 0.81  | GCACACCACCTTCCCTAGGCCAGTATTAACCTATTGCA     |
| Acceptor | -      | 17198 | 17158 | 0.63  | GAACTTCCACTCATGTTGCAGCACTACCGGCAGCAAAAAGGT |
| Acceptor | -      | 15970 | 15930 | 0.77  | ATATCTTCCATTTCCCAACAGTTGCGATCTATATTTTAGTC  |
| Acceptor | -      | 15653 | 15613 | 0.85  | CTGAAGTATTATTTTCTTAGAAGCAGTACTTCTGATACT    |
| Acceptor | -      | 15290 | 15250 | 0.52  | TATAATTGGTCTATTTCCAGCTGATGAACATTGCAAACCA   |
| Acceptor | -      | 15026 | 14986 | 0.43  | CTTTACCACCGCTTTATCAGAATCGATAAATTGAGGTCCT   |
| Acceptor | -      | 14954 | 14914 | 0.51  | TAGGTTCAGTGTCACCTATAGTTTGTAACCTTGCAGCATCA  |
| Acceptor | -      | 14669 | 14629 | 0.47  | CATTGCTTCAATTTGAATAGGTACAATCCGTAGGTGCAGT   |



| Type      | Strand | Start | End   | Score | Sequence                                    |
|-----------|--------|-------|-------|-------|---------------------------------------------|
| Acceptor  | -      | 13968 | 13928 | 0.68  | CAATTTGTTTTGCTGTATTAGTTACAAAATTGCCTATTTTA   |
| Acceptor  | -      | 13766 | 13726 | 0.55  | TTTATTGCTTCGAATTTTATAGCAGCGATGATTGTTCCAGCA  |
| Acceptor  | -      | 13602 | 13562 | 0.84  | TGACGTTTCGGTCGCCTGTAGGTTCTTGTCTCATCTGGAA    |
| Acceptor  | -      | 12543 | 12503 | 0.55  | CTTATTTTCATTGCCATCTAGTTTACTACATTGTATGATA    |
| Acceptor  | -      | 12499 | 12459 | 0.66  | CTTCTGGGTCAGTCATTACAGGTTCTATAGAATCTGGAAAT   |
| Acceptor  | -      | 12187 | 12147 | 0.81  | CATTTTTTTGTCTTCCAACAGTCAAATATTGATCAACTATA   |
| Acceptor  | -      | 12118 | 12078 | 0.73  | GTACTGTATAATTCCCTTCAGGAATGCTAAGTGTTACCCAA   |
| Acceptor  | -      | 11805 | 11765 | 0.88  | AATATTCGTTGTATCTTGCAGAGGTGGGAAAGGATTATACG   |
| Acceptor  | -      | 10903 | 10863 | 0.95  | TCAATACATTTTCCTGTCTAGGTGTGAGTGATTTATTACCC   |
| Acceptor  | -      | 10780 | 10740 | 0.9   | CATTTTGTATTTCACTTTCAGTTTCTTCAGGAATTTTCATTG  |
| Acceptor  | -      | 10771 | 10731 | 0.95  | TTTCACTTTTCAGTTTCTTCAGGAATTTTCATTGGAAGCAGAC |
| Acceptor  | -      | 10621 | 10581 | 0.53  | CTAACTTACTTGTTATATTAGAAGTAATATATCACCATCA    |
| Acceptor  | -      | 10177 | 10137 | 0.87  | TAACTAACTCTTGTATTATAGAATAAACTTTATCGGCCGTG   |
| Acceptor  | -      | 10099 | 10059 | 0.94  | CATTTAGTTTGTAGCTATAGGTTGTTTTTAAAATTCTCA     |
| Acceptor  | -      | 10057 | 10017 | 0.82  | TAGCATTTTGACTTCTTCCAGCTAAAAATGGATTCAACAATT  |
| Acceptor  | -      | 9963  | 9923  | 0.57  | CGTCGTCATCTTCACTCACAGTATCTTCTTCGTCAGACTCT   |
| Acceptor  | -      | 9948  | 9908  | 0.83  | TCACAGTATCTTCTTCGTCAGACTCTGGTCCCTCTAATGCA   |
| Acceptor  | -      | 9764  | 9724  | 0.81  | ATACGTACTTGTTTTTGCTAGTTTATCCGCTGTTGGATAGT   |
| Acceptor  | -      | 9577  | 9537  | 0.9   | TTTCCTTTATCATCTCTACAGTTAATTTTAGAAAAAATTCT   |
| Acceptor  | -      | 9192  | 9152  | 0.61  | CTTCTGACATTTTGGTTCAGGATCTCTAAAAATATCAACT    |
| Acceptor  | -      | 9046  | 9006  | 0.95  | TGTGACCCGCTCCTTCGCAGTTAGACACAGTTGATCGAAT    |
| Acceptor* | -      | 8971  | 8931  | 1     | CATTTTTTCTATTTTTATAGATTCGCATTTATCAGGAGTT    |
| Acceptor  | -      | 8956  | 8916  | 0.57  | TTATAGATTCGCATTTATCAGGAGTTAACAGGCCAGAGCGC   |
| Acceptor  | -      | 8244  | 8204  | 0.64  | TATTTGACTCACCTTACACAGATGGTTGGTTAAGAACTTTT   |
| Acceptor  | -      | 8075  | 8035  | 0.94  | ACGAGTTGGTTTACCTTTTCAGACTTAGACAAAGAGACAGAG  |
| Acceptor  | -      | 7995  | 7955  | 0.47  | GAGCTATTAGACACTTTATAGATAACTTACCAATAACACGC   |
| Acceptor  | -      | 7659  | 7619  | 0.78  | TAGTTAACTTTTTTCATTGTAGAACATATTGCAAGCACTTTA  |
| Acceptor  | -      | 7613  | 7573  | 0.41  | CTTATATATGAAACTTTATAGACATAGAAATTCAAGAAACA   |
| Acceptor  | -      | 6730  | 6690  | 0.91  | TTATAAAATTTTTTCCAATAGGCTCATGTGAAAATACTAAA   |
| Acceptor  | -      | 4908  | 4868  | 0.67  | TATTTGTTTCATCTCTACCTAGAACAGACTTCACTAAAACAA  |
| Acceptor* | -      | 3716  | 3676  | 0.41  | TTACTGTGTATGGTCCAACAGGCAGCGGTAATCGCAATTT    |
| Acceptor  | -      | 2718  | 2678  | 0.47  | AATACACTTTGCTTGCTATAGCAGGATCAAGCCTTATATTA   |
| Acceptor  | -      | 2628  | 2588  | 0.47  | TACAAAAATTTTTTGTGCAGCTTTAAATTTTAAATATGC     |
| Acceptor  | -      | 2571  | 2531  | 0.9   | GAGTATTCCTGTCCATGTAGGAGGGTACGTAGAATCATCA    |
| Acceptor  | -      | 1617  | 1577  | 0.83  | TTTTTAATTTTTTCAATGTAGGAAATAATATTTTCAGCAACA  |
| Acceptor  | -      | 1578  | 1538  | 0.55  | CACGATCACACATTTCTTTAGTGTCTTCTTAAGATATTCT    |
| Acceptor  | -      | 1565  | 1525  | 0.43  | TTCTTTAGTGTCTTCTTAAGATATTCTTTGCATTGCGGAC    |
| Acceptor  | -      | 1479  | 1439  | 0.88  | CTGGTAAATTTTTTACTATAGTTAAAGCCTTATCTACTACA   |
| Acceptor  | -      | 1458  | 1418  | 0.43  | TTAAAGCCTTATCTACTACAGAACCAGTACATATAGAACTA   |
| Acceptor  | -      | 1227  | 1187  | 0.91  | CTTCACTTCCTTCGTCCATAGCAGAACACTTACAAAAGAAA   |
| Acceptor  | -      | 564   | 524   | 0.5   | CAGCTGTTGGAATTGTTATAGATCTAATATTAGGAAGCCCA   |

**Table S2.** List of genomic sequences of AdVs used in phylogenetic analysis.

| Genbank Accession | Assembly Accession | Species Taxid | Species                             |
|-------------------|--------------------|---------------|-------------------------------------|
| U40839.3          | GCA_000842705.1    | 130327        | <i>Ovine atadenovirus D</i>         |
| AF252854.1        | GCA_000844185.1    | 114424        | <i>Ovine mastadenovirus A</i>       |
| AF030154.1        | GCA_000844245.1    | 129950        | <i>Bovine mastadenovirus B</i>      |
| AF083975.2        | GCA_000844285.1    | 190064        | <i>Fowl aviadenovirus D</i>         |
| J01917.1          | GCA_000845085.1    | 129951        | <i>Human mastadenovirus C</i>       |
| U46933.1          | GCA_000845105.1    | 190061        | <i>Fowl aviadenovirus A</i>         |
| AF036092.3        | GCA_000845805.1    | 130499        | <i>Bovine atadenovirus D</i>        |
| Y07760.1          | GCA_000845925.1    | 10537         | <i>Canine mastadenovirus A</i>      |
| Y09598.1          | GCA_000845945.1    | 130328        | <i>Duck atadenovirus A</i>          |
| AJ854486.1        | GCA_000845985.1    | 130310        | <i>Human mastadenovirus D</i>       |
| L19443.1          | GCA_000846685.1    | 130309        | <i>Human mastadenovirus F</i>       |
| HQ605912.1        | GCA_000846705.1    | 298334        | <i>Simian mastadenovirus A</i>      |
| X73487.1          | GCA_000846805.1    | 129875        | <i>Human mastadenovirus A</i>       |
| AF289262.1        | GCA_000846825.1    | 130371        | <i>Porcine mastadenovirus C</i>     |
| AY771780.1        | GCA_000847325.1    | 536079        | <i>Human mastadenovirus G</i>       |
| AY487947.1        | GCA_000859665.1    | 130308        | <i>Human mastadenovirus E</i>       |
| DQ086466.1        | GCA_000880515.1    | 108098        | <i>Human mastadenovirus B</i>       |
| EU835513.1        | GCA_000884755.1    | 696859        | <i>Murine mastadenovirus C</i>      |
| BK000415.1        | GCA_000885275.1    | 129956        | <i>Murine mastadenovirus A</i>      |
| GU936707.2        | GCA_000888635.1    | 1146875       | <i>Turkey aviadenovirus B</i>       |
| HM049560.1        | GCA_000889615.1    | 1146873       | <i>Murine mastadenovirus B</i>      |
| HQ241819.1        | GCA_000890695.1    | 1962299       | <i>Simian mastadenovirus B</i>      |
| GU188428.1        | GCA_000890915.1    | 190063        | <i>Fowl aviadenovirus C</i>         |
| JN252129.1        | GCA_000893815.1    | 1146874       | <i>Bat mastadenovirus B</i>         |
| GU226970.2        | GCA_000894355.2    | 1146877       | <i>Bat mastadenovirus A</i>         |
| JF510462.1        | GCA_000897155.1    | 1193420       | <i>Goose aviadenovirus A</i>        |
| HQ605912.1        | GCA_000905275.1    | 1986020       | <i>Simian mastadenovirus G</i>      |
| HQ913600.1        | GCA_000905855.1    | 1986022       | <i>Platyrrhini mastadenovirus A</i> |
| KC693022.1        | GCA_000906395.1    | 1962300       | <i>Simian mastadenovirus C</i>      |
| KC493646.1        | GCA_000907375.1    | 190062        | <i>Fowl aviadenovirus B</i>         |
| KF477312.1        | GCA_000912195.1    | 1962301       | <i>Turkey aviadenovirus C</i>       |
| FJ025931.1        | GCA_000913475.1    | 1986019       | <i>Simian mastadenovirus F</i>      |
| KF477313.1        | GCA_000913655.1    | 1962302       | <i>Turkey aviadenovirus D</i>       |
| KJ563221.1        | GCA_000920015.1    | 1986024       | <i>Sea lion mastadenovirus A</i>    |
| FN824512.2        | GCA_000921315.1    | 1548417       | <i>Pigeon aviadenovirus A</i>       |
| KJ469653.1        | GCA_000923915.1    | 1534553       | <i>Duck aviadenovirus B</i>         |
| KJ156523.1        | GCA_000923975.1    | 2003672       | <i>Lizard atadenovirus A</i>        |
| KM190146.1        | GCA_000928615.1    | 1986021       | <i>Simian mastadenovirus H</i>      |
| KJ675568.1        | GCA_000929035.1    | 2003673       | <i>Psittacine atadenovirus A</i>    |
| KP238322.1        | GCA_001271155.1    | 1986023       | <i>Skunk mastadenovirus A</i>       |
| KT160425.1        | GCA_001271175.1    | 129955        | <i>Equine mastadenovirus B</i>      |
| KP329563.1        | GCA_001430155.1    | 1986017       | <i>Simian mastadenovirus D</i>      |
| KP329564.1        | GCA_001430595.1    | 1986018       | <i>Simian mastadenovirus E</i>      |
| KT698853.1        | GCA_001629825.1    | 2015370       | <i>Bat mastadenovirus C</i>         |
| JN418926.1        | GCA_001714455.1    | 129954        | <i>Equine mastadenovirus A</i>      |
| KT698856.1        | GCA_001722965.1    | 2015372       | <i>Bat mastadenovirus D</i>         |
| KX121164.1        | GCA_001831345.1    | 2169708       | <i>Pigeon aviadenovirus B</i>       |
| KX871230.1        | GCA_001885425.1    | 2015376       | <i>Bat mastadenovirus G</i>         |
| KX505867.1        | GCA_001904845.1    | 2170002       | <i>Simian mastadenovirus I</i>      |

| Genbank Accession | Assembly Accession | Species Taxid | Species                            |
|-------------------|--------------------|---------------|------------------------------------|
| KX961095.1        | GCA_002158575.1    | 2015375       | <i>Bat mastadenovirus F</i>        |
| KY306667.1        | GCA_002163405.1    | 2170000       | <i>Deer mastadenovirus B</i>       |
| KY427939.1        | GCA_002219645.1    | 2170003       | <i>Squirrel mastadenovirus A</i>   |
| KY748210.1        | GCA_002355065.1    | 2169706       | <i>Deer atadenovirus A</i>         |
| KT862808.1        | GCA_002817995.1    | 190065        | <i>Fowl aviadenovirus E</i>        |
| BD269513.1        | GCA_002818015.1    | 129953        | <i>Bovine mastadenovirus A</i>     |
| AF083132.1        | GCA_002818095.1    | 130369        | <i>Porcine mastadenovirus A</i>    |
| AF258784.1        | GCA_002818135.1    | 242710        | <i>Tree shrew mastadenovirus A</i> |
| KX577802.1        | GCA_003032855.1    | 2169709       | <i>Psittacine aviadenovirus B</i>  |
| LC385827.1        | GCA_006415515.1    | 740971        | <i>Bat mastadenovirus</i>          |
| AP018374.1        | GCA_006425395.1    | 2039267       | <i>Eidolon helvum adenovirus</i>   |
| MK518392.1        | GCA_013088485.1    | 2734581       | <i>Ovine mastadenovirus C</i>      |
| MH580295.1        | GCA_013088515.1    | 2734577       | <i>Psittacine aviadenovirus C</i>  |
| LT841149.1        | GCA_900098775.1    | 2170001       | <i>Dolphin mastadenovirus B</i>    |

**Table S3.** List of genomic sequences of adenoviruses used in phylogenetic analysis of *Atadenovirus* genus.

| Genbank Accession | Assembly Accession | Species Taxid | Species Name                     |
|-------------------|--------------------|---------------|----------------------------------|
| KY468407.1        | GCA_006434375.1    | 2169706       | <i>Deer atadenovirus A</i>       |
| KY468406.1        | GCA_006434395.1    | 2169706       | <i>Deer atadenovirus A</i>       |
| KY468405.1        | GCA_006434415.1    | 2169706       | <i>Deer atadenovirus A</i>       |
| KY468404.1        | GCA_006434435.1    | 2169706       | <i>Deer atadenovirus A</i>       |
| KY468403.1        | GCA_006434455.1    | 2169706       | <i>Deer atadenovirus A</i>       |
| KY468402.1        | GCA_006434475.1    | 2169706       | <i>Deer atadenovirus A</i>       |
| KJ452173.1        | GCA_006441505.1    | 130328        | <i>Duck atadenovirus A</i>       |
| KJ452172.1        | GCA_006441535.1    | 130328        | <i>Duck atadenovirus A</i>       |
| KJ452171.1        | GCA_006441555.1    | 130328        | <i>Duck atadenovirus A</i>       |
| KJ452170.1        | GCA_006441585.1    | 130328        | <i>Duck atadenovirus A</i>       |
| KF286430.1        | GCA_006445115.1    | 130328        | <i>Duck atadenovirus A</i>       |
| MK343439.1        | GCA_007310695.1    | 2169706       | <i>Deer atadenovirus A</i>       |
| MN025529.1        | GCA_008297635.1    | 1580497       | <i>Psittacine atadenovirus A</i> |
| MK537328.1        | GCA_008375655.1    | 2169706       | <i>Deer atadenovirus A</i>       |
| MN310513.1        | GCA_009793125.1    | 130328        | <i>Duck atadenovirus A</i>       |
| MT646045.1        | GCA_015221715.1    | 130328        | <i>Duck atadenovirus A</i>       |
| LC597488.1        | GCA_016759075.1    | 346178        | <i>Bovine adenovirus F</i>       |
| LC606503.1        | GCA_017161635.1    | 10511         | <i>Bovine adenovirus F</i>       |
| MN901942.2        | GCA_017498715.2    | 10511         | <i>Bovine adenovirus F</i>       |
| MT050041.1        | GCA_018591195.1    | 2729647       | <i>Lizard atadenovirus B</i>     |
| U40839.3          | GCF_000842705.1    | 114430        | <i>Ovine atadenovirus D</i>      |
| AF036092.3        | GCF_000845805.1    | 70333         | <i>Bovine atadenovirus D</i>     |
| Y09598.1          | GCF_000845945.1    | 130329        | <i>Duck atadenovirus A</i>       |
| BK000404.1        | GCF_000886775.1    | 130329        | <i>Duck atadenovirus A</i>       |
| JQ345700.1        | GCF_000904975.1    | 111167        | <i>Bovine atadenovirus E</i>     |
| KJ156523.1        | GCF_000923975.1    | 874272        | <i>Lizard atadenovirus A</i>     |
| KJ675568.1        | GCF_000929035.1    | 1580497       | <i>Psittacine atadenovirus A</i> |
| KY748210.1        | GCF_002355065.1    | 78522         | <i>Deer atadenovirus A</i>       |
| KY427939.1        | GCA_002219645.1    | 2773314       | <i>Squirrel mastadenovirus A</i> |

**Table S4.** List of reference sequences of *Atadenovirus* genus.

| Species | GenBank accession |
|---------|-------------------|
| BAdV-D  | AF036092          |
| BAdV-E  | JQ345700          |
| DeAdV-A | MK343439          |
| DAdV-1  | AC_000004         |
| LiAdV-2 | KJ156523          |
| BDAV-1  | MT050041          |
| OAdV-D  | U40839            |
| PaAdV-1 | MT674683          |
| PsAdV-3 | KJ675568          |
| SnAdV-A | Q106414           |

**Table S5.** The length of ITR region within *Adenoviridae* family. Based on complete genome sequences, uploaded to the NCBI database (date of accession: 1 September 2021).

| TAX                                           | Organism name               | Annotated ITR length min | Annotated ITR length max |
|-----------------------------------------------|-----------------------------|--------------------------|--------------------------|
| <i>Atadenovirus/Bovine adenovirus E</i>       | Bovine adenovirus 6         | 42                       | 534                      |
| <i>Atadenovirus/Bovine atadenovirus D</i>     | Bovine adenovirus 4         | 59                       | 59                       |
| <i>Atadenovirus/Bovine atadenovirus D</i>     | Bovine adenovirus 5         | 67                       | 67                       |
| <i>Atadenovirus/Bovine adenovirus F</i>       | Bovine adenovirus 7         | 36                       | 45                       |
| <i>Atadenovirus/Deer atadenovirus A</i>       | Odocoileus adenovirus 1     | 40                       | 40                       |
| <i>Atadenovirus/Duck atadenovirus A</i>       | Duck adenovirus 1           | 51                       | 53                       |
| <i>Atadenovirus/Lizard atadenovirus A</i>     | Lizard adenovirus 2         | 125                      | 125                      |
| <i>Atadenovirus/Lizard atadenovirus B</i>     | Bearded dragon adenovirus 1 | 194                      | 194                      |
| <i>Atadenovirus/Ovine atadenovirus D</i>      | Ovine adenovirus 7          | 46                       | 46                       |
| <i>Atadenovirus/Psittacine atadenovirus A</i> | Psittacine adenovirus 3     | 45                       | 45                       |
| <i>Atadenovirus/Snake atadenovirus A</i>      | Snake adenovirus 1          | 118                      | 118                      |
| <i>Aviadenovirus/Duck aviadenovirus B</i>     | Duck adenovirus 2           | 721                      | 721                      |
| <i>Aviadenovirus/Fowl aviadenovirus A</i>     | Fowl aviadenovirus 1        | 54                       | 236                      |
| <i>Aviadenovirus/Fowl aviadenovirus B</i>     | Fowl aviadenovirus 5        | 86                       | 86                       |
| <i>Aviadenovirus/Fowl aviadenovirus C</i>     | Fowl aviadenovirus 10       | 56                       | 56                       |
| <i>Aviadenovirus/Fowl aviadenovirus C</i>     | Fowl aviadenovirus 4        | 56                       | 56                       |
| <i>Aviadenovirus/Fowl aviadenovirus D</i>     | Fowl aviadenovirus 11       | 72                       | 72                       |
| <i>Aviadenovirus/Fowl aviadenovirus D</i>     | Fowl aviadenovirus 2        | 72                       | 72                       |
| <i>Aviadenovirus/Fowl aviadenovirus D</i>     | Fowl aviadenovirus 3        | 72                       | 72                       |
| <i>Aviadenovirus/Fowl aviadenovirus D</i>     | Fowl aviadenovirus 9        | 72                       | 72                       |
| <i>Aviadenovirus/Fowl aviadenovirus E</i>     | Fowl adenovirus 8a          | 77                       | 77                       |
| <i>Aviadenovirus/Fowl aviadenovirus E</i>     | Fowl adenovirus 8b          | 77                       | 77                       |
| <i>Aviadenovirus/Fowl aviadenovirus E</i>     | Fowl aviadenovirus 6        | 62                       | 62                       |
| <i>Aviadenovirus/Fowl aviadenovirus E</i>     | Fowl aviadenovirus 7        | 77                       | 77                       |
| <i>Aviadenovirus/Goose aviadenovirus A</i>    | Goose adenovirus 4          | 39                       | 39                       |
| <i>Aviadenovirus/Pigeon aviadenovirus A</i>   | Pigeon adenovirus 1         | 56                       | 56                       |
| <i>Aviadenovirus/Pigeon aviadenovirus B</i>   | Pigeon adenovirus 2         | 45                       | 45                       |
| <i>Aviadenovirus/Turkey aviadenovirus B</i>   | Turkey adenovirus 1         | 95                       | 95                       |
| <i>Aviadenovirus/Turkey aviadenovirus C</i>   | Turkey aviadenovirus 4      | 62                       | 62                       |
| <i>Aviadenovirus/Turkey aviadenovirus D</i>   | Turkey aviadenovirus 5      | 118                      | 118                      |
| <i>Mastadenovirus/Bat mastadenovirus C</i>    | Bat mastadenovirus WIV10    | 51                       | 51                       |
| <i>Mastadenovirus/Bat mastadenovirus C</i>    | Bat mastadenovirus WIV11    | 51                       | 51                       |
| <i>Mastadenovirus/Bat mastadenovirus C</i>    | Bat mastadenovirus WIV9     | 35                       | 35                       |

| TAX                                            | Organism name                   | Annotated ITR length min | Annotated ITR length max |
|------------------------------------------------|---------------------------------|--------------------------|--------------------------|
| <i>Mastadenovirus/Bat mastadenovirus D</i>     | Bat mastadenovirus WIV12        | 73                       | 73                       |
| <i>Mastadenovirus/Bat mastadenovirus E</i>     | Bat mastadenovirus WIV13        | 61                       | 61                       |
| <i>Mastadenovirus/Bat mastadenovirus F</i>     | Bat mastadenovirus WIV17        | 178                      | 178                      |
| <i>Mastadenovirus/Bat mastadenovirus G</i>     | Bat mastadenovirus WIV18        | 177                      | 177                      |
| <i>Mastadenovirus/Bovine mastadenovirus A</i>  | Bovine adenovirus 1             | 159                      | 159                      |
| <i>Mastadenovirus/Bovine mastadenovirus C</i>  | Bovine adenovirus 10            | 368                      | 370                      |
| <i>Mastadenovirus/Canine mastadenovirus A</i>  | Canine adenovirus 1             | 161                      | 199                      |
| <i>Mastadenovirus/Canine mastadenovirus A</i>  | Canine adenovirus 2             | 196                      | 198                      |
| <i>Mastadenovirus/Dolphin mastadenovirus B</i> | Bottlenose dolphin adenovirus 1 | 220                      | 220                      |
| <i>Mastadenovirus/Equine mastadenovirus A</i>  | Equine adenovirus 1             | 101                      | 320                      |
| <i>Mastadenovirus/Equine mastadenovirus B</i>  | Equine adenovirus 2             | 253                      | 253                      |
| <i>Mastadenovirus/Human mastadenovirus A</i>   | Human adenovirus 12             | 161                      | 164                      |
| <i>Mastadenovirus/Human mastadenovirus A</i>   | Human adenovirus 18             | 167                      | 464                      |
| <i>Mastadenovirus/Human mastadenovirus A</i>   | Human adenovirus 31             | 86                       | 150                      |
| <i>Mastadenovirus/Human mastadenovirus B</i>   | Human adenovirus 11             | 137                      | 137                      |
| <i>Mastadenovirus/Human mastadenovirus B</i>   | Human adenovirus 11+34          | 137                      | 137                      |
| <i>Mastadenovirus/Human mastadenovirus B</i>   | Human adenovirus 14             | 133                      | 137                      |
| <i>Mastadenovirus/Human mastadenovirus B</i>   | Human adenovirus 16             | 114                      | 114                      |
| <i>Mastadenovirus/Human mastadenovirus B</i>   | Human adenovirus 21             | 90                       | 114                      |
| <i>Mastadenovirus/Human mastadenovirus B</i>   | Human adenovirus 21a            | 98                       | 108                      |
| <i>Mastadenovirus/Human mastadenovirus B</i>   | Human adenovirus 34             | 137                      | 137                      |
| <i>Mastadenovirus/Human mastadenovirus B</i>   | Human adenovirus 35             | 137                      | 137                      |
| <i>Mastadenovirus/Human mastadenovirus B</i>   | Human adenovirus 50             | 114                      | 114                      |
| <i>Mastadenovirus/Human mastadenovirus B</i>   | Human adenovirus 55             | 77                       | 143                      |
| <i>Mastadenovirus/Human mastadenovirus B</i>   | Human adenovirus 7              | 108                      | 136                      |
| <i>Mastadenovirus/Human mastadenovirus B</i>   | Human adenovirus B3             | 111                      | 195                      |
| <i>Mastadenovirus/Human mastadenovirus B</i>   | Simian adenovirus 21            | 121                      | 121                      |
| <i>Mastadenovirus/Human mastadenovirus B</i>   | Simian adenovirus 29            | 132                      | 132                      |
| <i>Mastadenovirus/Human mastadenovirus B</i>   | Simian adenovirus 32            | 131                      | 131                      |
| <i>Mastadenovirus/Human mastadenovirus B</i>   | Simian adenovirus 33            | 131                      | 131                      |
| <i>Mastadenovirus/Human mastadenovirus C</i>   | Human adenovirus 1              | 103                      | 103                      |
| <i>Mastadenovirus/Human mastadenovirus C</i>   | Human adenovirus 2              | 102                      | 721                      |
| <i>Mastadenovirus/Human mastadenovirus C</i>   | Human adenovirus 5              | 103                      | 148                      |
| <i>Mastadenovirus/Human mastadenovirus C</i>   | Human adenovirus 6              | 102                      | 103                      |
| <i>Mastadenovirus/Human mastadenovirus C</i>   | Simian adenovirus 34            | 119                      | 119                      |
| <i>Mastadenovirus/Human mastadenovirus D</i>   | Human adenovirus 19             | 154                      | 154                      |
| <i>Mastadenovirus/Human mastadenovirus D</i>   | Human adenovirus 36             | 86                       | 86                       |
| <i>Mastadenovirus/Human mastadenovirus D</i>   | Human adenovirus D9             | 159                      | 160                      |
| <i>Mastadenovirus/Human mastadenovirus E</i>   | Human adenovirus 4p             | 115                      | 115                      |
| <i>Mastadenovirus/Human mastadenovirus E</i>   | Human adenovirus E4             | 115                      | 400                      |
| <i>Mastadenovirus/Human mastadenovirus E</i>   | Simian adenovirus 23            | 123                      | 123                      |
| <i>Mastadenovirus/Human mastadenovirus E</i>   | Simian adenovirus 24            | 132                      | 132                      |
| <i>Mastadenovirus/Human mastadenovirus E</i>   | Simian adenovirus 25            | 119                      | 119                      |
| <i>Mastadenovirus/Human mastadenovirus E</i>   | Simian adenovirus 25.2          | 126                      | 126                      |
| <i>Mastadenovirus/Human mastadenovirus E</i>   | Simian adenovirus 26            | 131                      | 131                      |
| <i>Mastadenovirus/Human mastadenovirus E</i>   | Simian adenovirus 30            | 126                      | 126                      |
| <i>Mastadenovirus/Human mastadenovirus E</i>   | Simian adenovirus 37            | 127                      | 127                      |

| TAX                                                | Organism name                    | Annotated ITR length min | Annotated ITR length max |
|----------------------------------------------------|----------------------------------|--------------------------|--------------------------|
| <i>Mastadenovirus/Human mastadenovirus E</i>       | Simian adenovirus 38             | 130                      | 130                      |
| <i>Mastadenovirus/Human mastadenovirus E</i>       | Simian adenovirus 39             | 126                      | 126                      |
| <i>Mastadenovirus/Human mastadenovirus E</i>       | Simian adenovirus E22            | 120                      | 120                      |
| <i>Mastadenovirus/Human mastadenovirus F</i>       | Human adenovirus 40              | 161                      | 163                      |
| <i>Mastadenovirus/Human mastadenovirus F</i>       | Human adenovirus 41              | 152                      | 160                      |
| <i>Mastadenovirus/Human mastadenovirus G</i>       | Human adenovirus 52              | 60                       | 60                       |
| <i>Mastadenovirus/Human mastadenovirus G</i>       | Simian adenovirus 1              | 121                      | 121                      |
| <i>Mastadenovirus/Human mastadenovirus G</i>       | Simian adenovirus 11             | 71                       | 71                       |
| <i>Mastadenovirus/Murine mastadenovirus A</i>      | Murine adenovirus 1              | 93                       | 93                       |
| <i>Mastadenovirus/Murine mastadenovirus B</i>      | Murine adenovirus 2              | 121                      | 121                      |
| <i>Mastadenovirus/Murine mastadenovirus C</i>      | Murine adenovirus 3              | 126                      | 126                      |
| <i>Mastadenovirus/Ovine mastadenovirus C</i>       | Ovine adenovirus 8               | 93                       | 93                       |
| <i>Mastadenovirus/Platyrrhini mastadenovirus A</i> | Titi monkey adenovirus ECC-2011  | 143                      | 143                      |
| <i>Mastadenovirus/Porcine mastadenovirus A</i>     | Porcine adenovirus 1             | 147                      | 147                      |
| <i>Mastadenovirus/Porcine mastadenovirus A</i>     | Porcine adenovirus 3             | 144                      | 144                      |
| <i>Mastadenovirus/Porcine mastadenovirus B</i>     | Porcine adenovirus 4             | 238                      | 238                      |
| <i>Mastadenovirus/Sea lion mastadenovirus A</i>    | California sea lion adenovirus 1 | 109                      | 109                      |
| <i>Mastadenovirus/Simian adenovirus B</i>          | Cynomolgus adenovirus 1          | 208                      | 208                      |
| <i>Mastadenovirus/Simian adenovirus B</i>          | Simian adenovirus 50             | 215                      | 215                      |
| <i>Mastadenovirus/Simian adenovirus B</i>          | Simian adenovirus A1139          | 216                      | 216                      |
| <i>Mastadenovirus/Simian adenovirus B</i>          | Simian adenovirus A1163          | 220                      | 220                      |
| <i>Mastadenovirus/Simian adenovirus B</i>          | Simian adenovirus A1173          | 178                      | 178                      |
| <i>Mastadenovirus/Simian adenovirus B</i>          | Simian adenovirus A1258          | 168                      | 168                      |
| <i>Mastadenovirus/Simian adenovirus B</i>          | Simian adenovirus A1285          | 166                      | 166                      |
| <i>Mastadenovirus/Simian adenovirus B</i>          | Simian adenovirus A1296          | 194                      | 194                      |
| <i>Mastadenovirus/Simian adenovirus B</i>          | Simian adenovirus A1312          | 215                      | 215                      |
| <i>Mastadenovirus/Simian adenovirus B</i>          | Simian adenovirus A1327          | 215                      | 215                      |
| <i>Mastadenovirus/Simian adenovirus B</i>          | Simian adenovirus A1335          | 216                      | 216                      |
| <i>Mastadenovirus/Simian mastadenovirus A</i>      | Simian adenovirus 3              | 173                      | 173                      |
| <i>Mastadenovirus/Simian mastadenovirus A</i>      | Simian adenovirus 48             | 173                      | 173                      |
| <i>Mastadenovirus/Simian mastadenovirus A</i>      | Simian adenovirus 6              | 150                      | 150                      |
| <i>Mastadenovirus/Simian mastadenovirus B</i>      | Simian adenovirus 49             | 215                      | 215                      |
| <i>Mastadenovirus/Simian mastadenovirus D</i>      | Simian adenovirus 13             | 124                      | 124                      |
| <i>Mastadenovirus/Simian mastadenovirus E</i>      | Simian adenovirus 16             | 181                      | 181                      |
| <i>Mastadenovirus/Simian mastadenovirus F</i>      | Simian adenovirus 18             | 180                      | 180                      |
| <i>Mastadenovirus/Simian mastadenovirus G</i>      | Simian adenovirus 20             | 178                      | 178                      |
| <i>Mastadenovirus/Simian mastadenovirus H</i>      | Simian adenovirus DM-2014        | 159                      | 159                      |
| <i>Mastadenovirus/Simian mastadenovirus I</i>      | Simian mastadenovirus WIV19      | 95                       | 95                       |
| <i>Mastadenovirus/Skunk mastadenovirus A</i>       | Skunk adenovirus PB1             | 181                      | 181                      |
| <i>Mastadenovirus/Tree shrew mastadenovirus A</i>  | Tree shrew adenovirus 1          | 166                      | 166                      |
| <i>Siadenovirus/Frog siadenovirus A</i>            | Frog adenovirus 1                | 36                       | 36                       |
| <i>Siadenovirus/Skua siadenovirus A</i>            | Skua adenovirus 1                | 30                       | 30                       |
| <i>Siadenovirus/Turkey siadenovirus A</i>          | Turkey adenovirus 3              | 40                       | 40                       |

**Table S6.** Homologous sequences of hypothetical proteins corresponding to the open reading frames of the variable region of the TAdV, founded by blast search.

| TeAdV-1 ORF | BLAST Best Hit                               | % Cover | % Identity |
|-------------|----------------------------------------------|---------|------------|
| ORF1        | hypothetical protein [DAdV-1]<br>QOS14199.1  | 96%     | 41.10%     |
| ORF2        | hypothetical protein [DAdV-1]<br>NP_044721.1 | 86%     | 35.71%     |
| ORF3        | hypothetical protein [DAdV-1]<br>AJA72346.1  | 90%     | 28.00%     |
| ORF4        | hypothetical protein [PsAdV-3]<br>QEJ80748.1 | 96%     | 32.03%     |
| ORF5        | hypothetical protein [PsAdV-3]<br>QEJ80748.1 | 95%     | 30.56%     |
| ORF6        | hypothetical protein [PsAdV-3]<br>QEJ80748.1 | 96%     | 37.00%     |
| ORF7        | hypothetical protein [DAdV-1]<br>QTH80092.1  | 87%     | 43.90%     |
| ORF8        | -                                            | -       | -          |

**Table S7.** Candidate sites for pervasive positive selection ( $PP \geq 0.7$ ), identified by CODEML.

| Protein           | Amino Acid Coordinate | PP    |
|-------------------|-----------------------|-------|
| Pol               | 586                   | 0.842 |
| Pol               | 280                   | 0.761 |
| Pol               | 83                    | 0.758 |
| Pol               | 251                   | 0.75  |
| pTP               | 334                   | 0.755 |
| pTP               | 230                   | 0.718 |
| III (penton base) | 302                   | 0.724 |

**Table S8.** Candidate sites for pervasive positive selection ( $P \leq 0.1$ ), identified by FEL.

| Protein | Amino Acid Coordinate | P      |
|---------|-----------------------|--------|
| Pol     | 177                   | 0.0948 |
| Pol     | 398                   | 0.0914 |
| Pol     | 598                   | 0.0352 |
| Pol     | 624                   | 0.0530 |
| Pol     | 775                   | 0.0759 |
| Pol     | 780                   | 0.0090 |
| Pol     | 781                   | 0.0965 |
| Pol     | 832                   | 0.0169 |
| pIIIa   | 301                   | 0.0829 |
| DBP     | 187                   | 0.0573 |

**Table S9.** Identified candidate sites for episodic positive selection. PP values  $\geq 0.95$  are in bold.

| Protein      | Amino Acid Coordinate | PP (CODEML) | PP (HyPhy)   |
|--------------|-----------------------|-------------|--------------|
| 100K protein | 107                   | 0.818       | 0.843        |
| 100K protein | 118                   | 0.886       | <b>0.962</b> |
| 100K protein | 149                   | 0.880       | 0.937        |
| 100K protein | 205                   | 0.865       | 0.895        |

| Protein      | Amino Acid Coordinate | PP (CODEML)  | PP (HyPhy)   |
|--------------|-----------------------|--------------|--------------|
| 100K protein | 222                   | 0.890        | 0.750        |
| 100K protein | 230                   | 0.807        | <b>0.951</b> |
| 100K protein | 240                   | 0.843        | 0.863        |
| 100K protein | 258                   | 0.763        | 0.931        |
| 100K protein | 321                   | 0.867        | 0.882        |
| 100K protein | 356                   | 0.770        | 0.717        |
| 100K protein | 395                   | 0.876        | 0.929        |
| 100K protein | 43                    | 0.873        | 0.929        |
| 100K protein | 448                   | 0.800        | 0.769        |
| 100K protein | 450                   | 0.905        | <b>0.972</b> |
| 100K protein | 487                   | 0.841        | 0.833        |
| 100K protein | 519                   | 0.777        | 0.790        |
| 100K protein | 96                    | 0.870        | <b>0.972</b> |
| 52K protein  | 121                   | 0.814        | 0.919        |
| 52K protein  | 126                   | 0.844        | 0.926        |
| 52K protein  | 13                    | 0.903        | <b>0.955</b> |
| 52K protein  | 145                   | 0.786        | 0.891        |
| 52K protein  | 160                   | 0.778        | 0.714        |
| 52K protein  | 162                   | 0.904        | <b>0.950</b> |
| 52K protein  | 180                   | 0.936        | <b>0.980</b> |
| 52K protein  | 192                   | <b>0.974</b> | <b>0.990</b> |
| 52K protein  | 292                   | 0.772        | 0.815        |
| 52K protein  | 320                   | 0.803        | 0.851        |
| 52K protein  | 35                    | <b>0.953</b> | 0.946        |
| 52K protein  | 99                    | 0.872        | 0.905        |
| DBP          | 319                   | 0.820        | 0.836        |
| pIIIa        | 142                   | 0.716        | 0.700        |
| pIIIa        | 299                   | 0.789        | 0.947        |
| pIVa2        | 109                   | 0.882        | <b>0.950</b> |
| pIVa2        | 123                   | 0.937        | <b>0.983</b> |
| pIVa2        | 137                   | 0.894        | <b>0.982</b> |
| pIVa2        | 152                   | 0.946        | <b>0.971</b> |
| pIVa2        | 297                   | 0.858        | 0.845        |
| pIVa2        | 55                    | 0.742        | 0.820        |
| pIVa2        | 56                    | 0.785        | 0.861        |
| pIVa2        | 68                    | 0.894        | 0.949        |
| pIVa2        | 94                    | 0.935        | <b>0.964</b> |
| Pol          | 1044                  | 0.862        | <b>0.951</b> |
| Pol          | 1066                  | 0.857        | 0.874        |
| Pol          | 131                   | 0.944        | 0.934        |
| Pol          | 177                   | 0.793        | 0.869        |
| Pol          | 18                    | 0.919        | 0.863        |
| Pol          | 212                   | 0.852        | 0.945        |
| Pol          | 224                   | 0.821        | 0.925        |
| Pol          | 274                   | 0.708        | 0.718        |
| Pol          | 341                   | 0.909        | 0.929        |
| Pol          | 366                   | 0.934        | <b>0.973</b> |
| Pol          | 367                   | 0.927        | <b>0.962</b> |
| Pol          | 452                   | 0.866        | 0.885        |
| Pol          | 514                   | 0.762        | 0.768        |



| Protein | Amino Acid Coordinate | PP (CODEML) | PP (HyPhy)   |
|---------|-----------------------|-------------|--------------|
| Pol     | 650                   | 0.854       | 0.932        |
| Pol     | 687                   | 0.801       | 0.735        |
| Pol     | 742                   | 0.796       | 0.736        |
| Pol     | 773                   | 0.941       | <b>0.961</b> |
| Pol     | 900                   | 0.860       | 0.860        |
| pTP     | 115                   | 0.853       | 0.923        |
| pTP     | 145                   | 0.850       | <b>0.961</b> |
| pTP     | 162                   | 0.804       | 0.842        |
| pTP     | 178                   | 0.856       | 0.914        |
| pTP     | 187                   | 0.946       | <b>0.966</b> |
| pTP     | 208                   | 0.882       | 0.886        |
| pTP     | 236                   | 0.793       | 0.833        |
| pTP     | 242                   | 0.913       | 0.820        |
| pTP     | 297                   | 0.859       | <b>0.975</b> |
| pTP     | 405                   | 0.926       | <b>0.952</b> |
| pTP     | 41                    | 0.901       | 0.947        |
| pTP     | 44                    | 0.946       | <b>0.972</b> |
| pTP     | 445                   | 0.939       | <b>0.966</b> |
| pTP     | 447                   | 0.908       | 0.783        |
| pTP     | 469                   | 0.750       | 0.905        |
| pTP     | 485                   | 0.777       | 0.829        |
| pTP     | 50                    | 0.904       | 0.844        |
| pTP     | 550                   | 0.892       | 0.899        |
| pTP     | 554                   | 0.762       | 0.948        |
| pTP     | 561                   | 0.767       | 0.787        |
| pTP     | 565                   | 0.795       | <b>0.950</b> |
| pTP     | 569                   | 0.868       | 0.869        |
| pTP     | 89                    | 0.930       | <b>0.966</b> |
| pTP     | 96                    | 0.939       | <b>0.988</b> |
| pVIII   | 110                   | 0.828       | 0.817        |
| pVIII   | 115                   | 0.802       | 0.888        |
| pVIII   | 32                    | 0.859       | 0.927        |

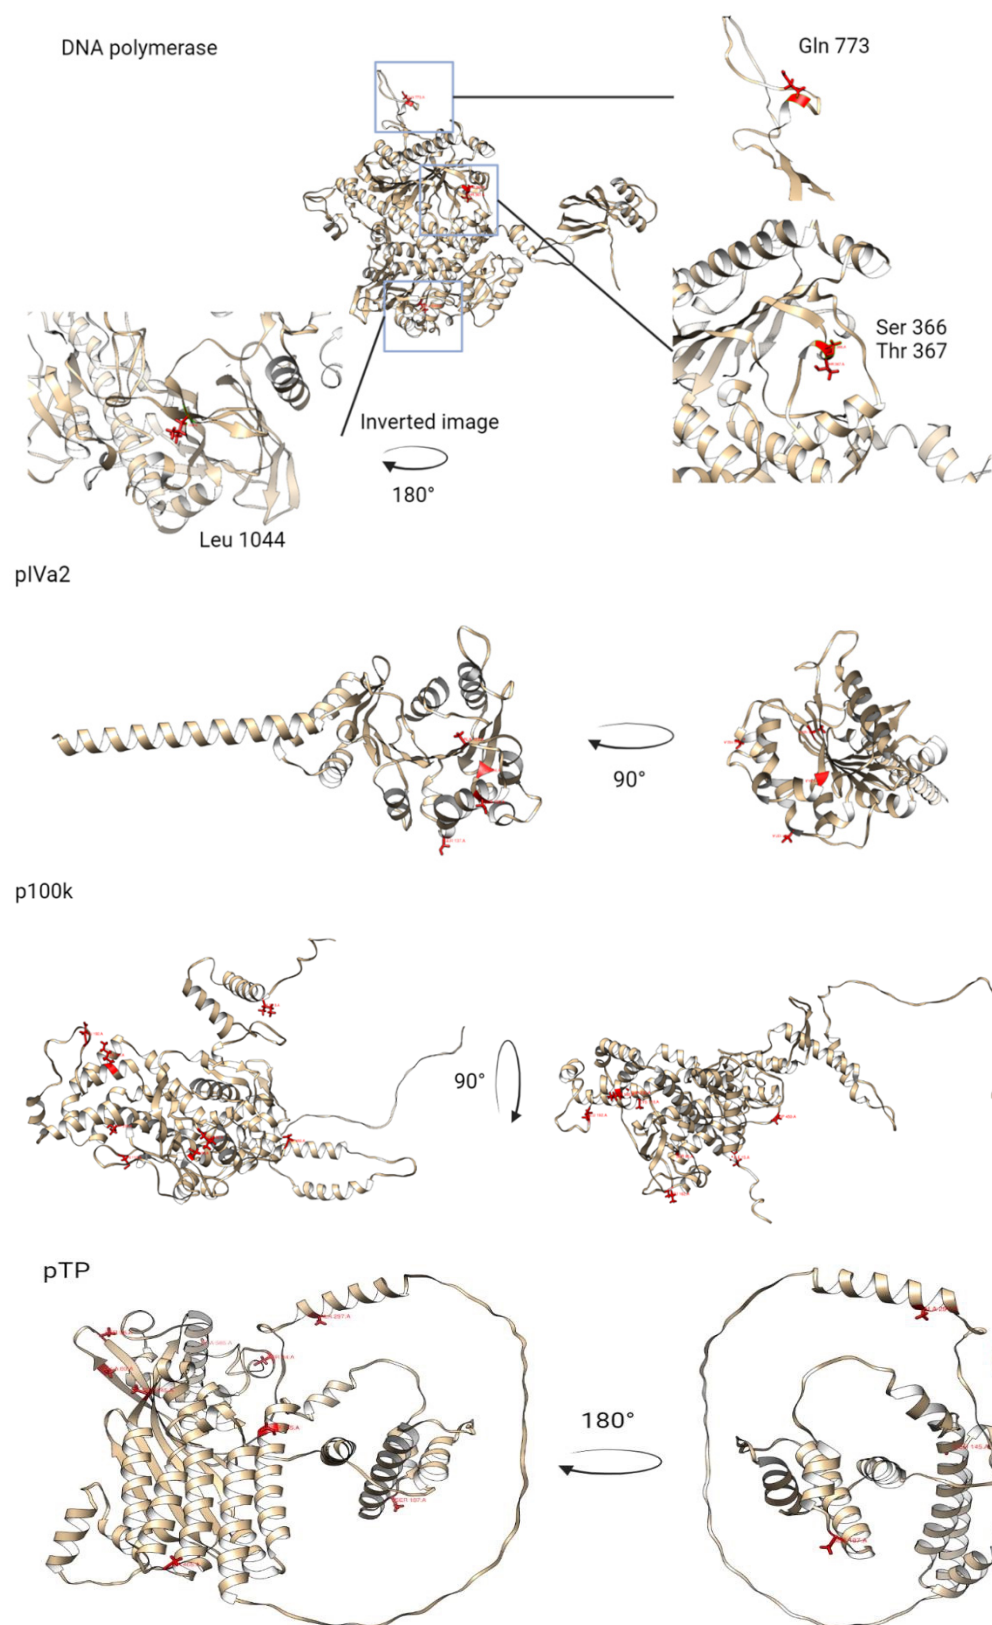

**Figure S1.** Predicted 3D structures of proteins where candidate sites for positive selection were identified (marked with red color).
